# Supplementary material
Source: publisher figshare collection journal article supplement (https://springernature.figshare.com/ndownloader/files/12737432)

### Odds of migrating to more rural areas for newly certified physicians working in second tertile areas in 2012 (sub-analysis)

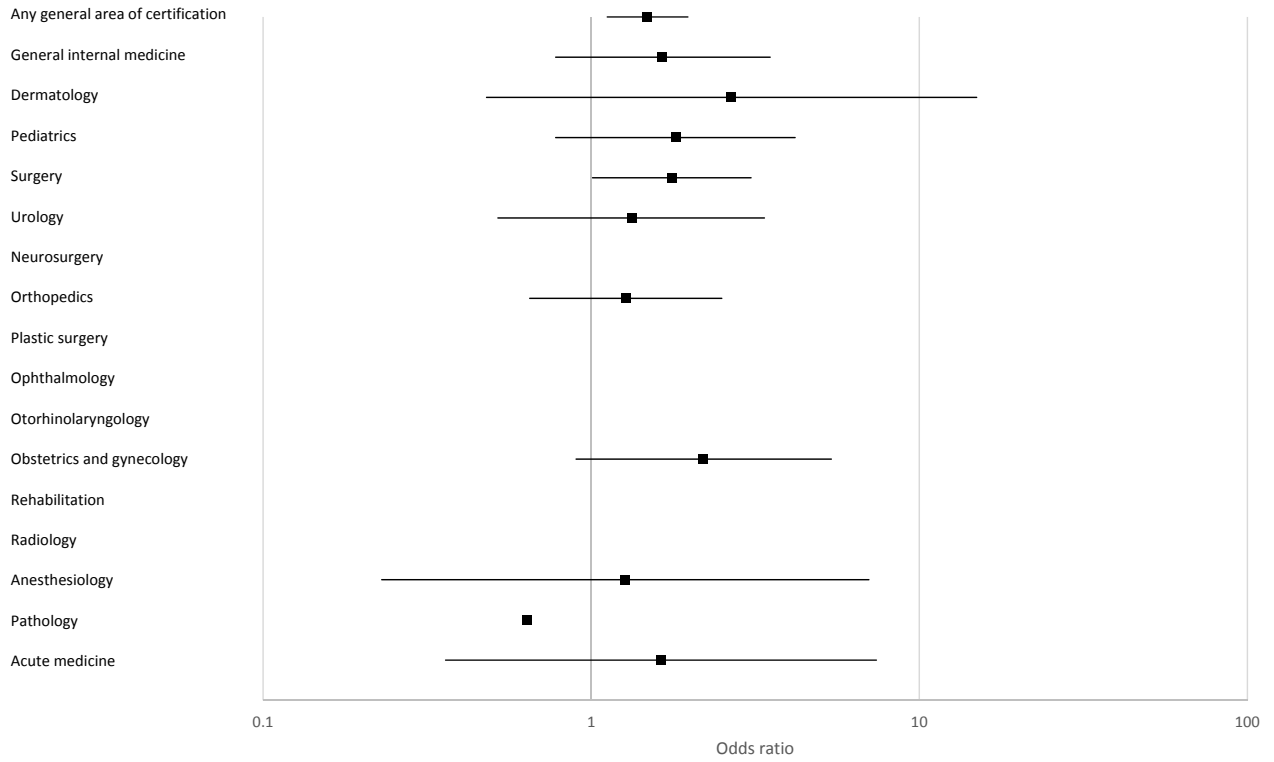

### Odds of migrating to more rural areas for newly certified physicians working in third tertile areas in 2012 (sub-analysis)

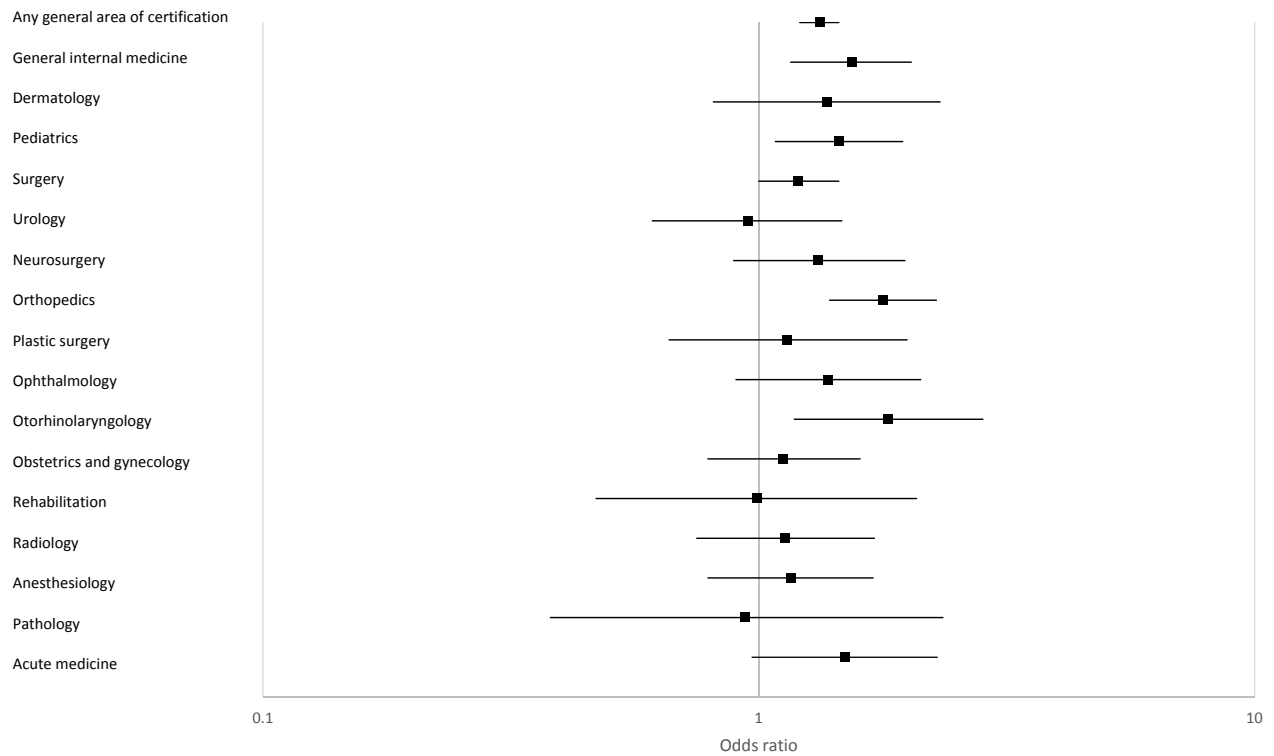

Supplement: Supplementary file [file 12737432]
